# Supplementary material
Source: publisher figshare collection journal article supplement (https://plos.figshare.com/articles/dataset/_/142558)
Supplement: Supplementary file [file 1]

## Serial Isolates

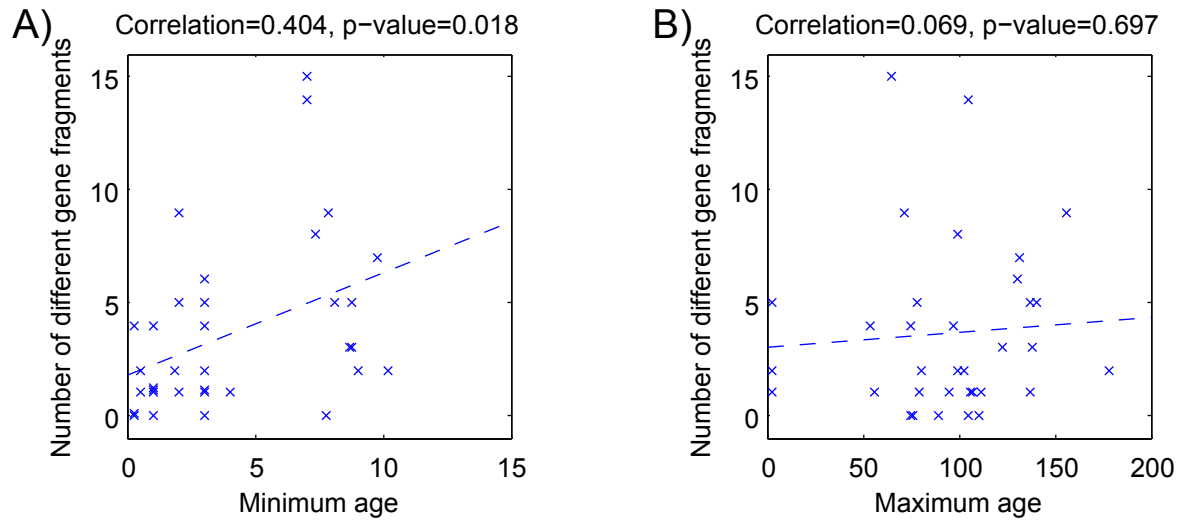

## Families

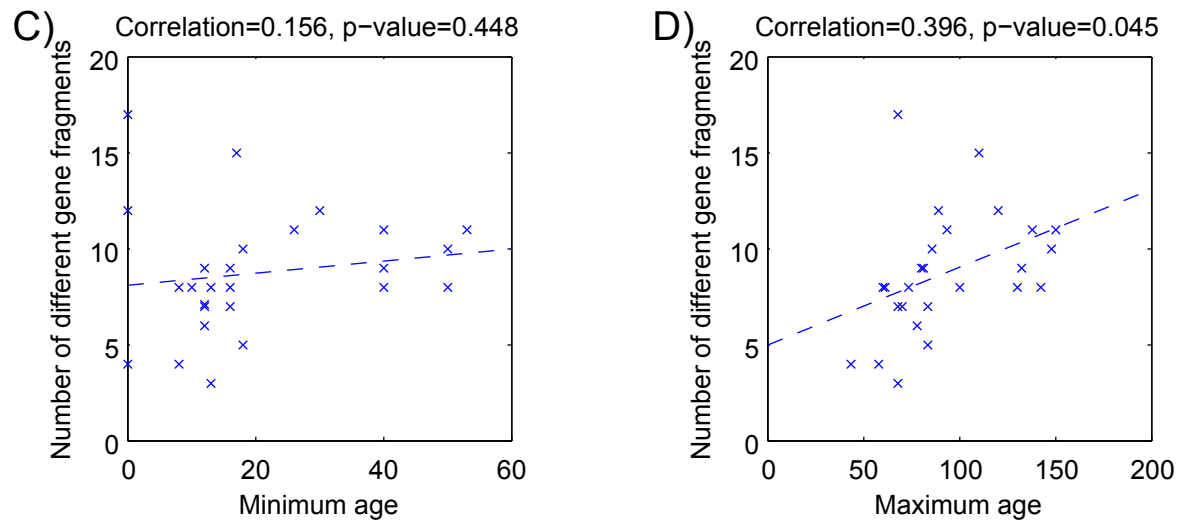

Figure S1. As in Fig. 3, except that pair-wise comparisons between isolates from families 23 and 26 were not included in parts C and D.
