# Supplementary material
Source: publisher figshare collection journal article supplement (https://plos.figshare.com/articles/dataset/_/142558)
Supplement: Supplementary file [file 1]

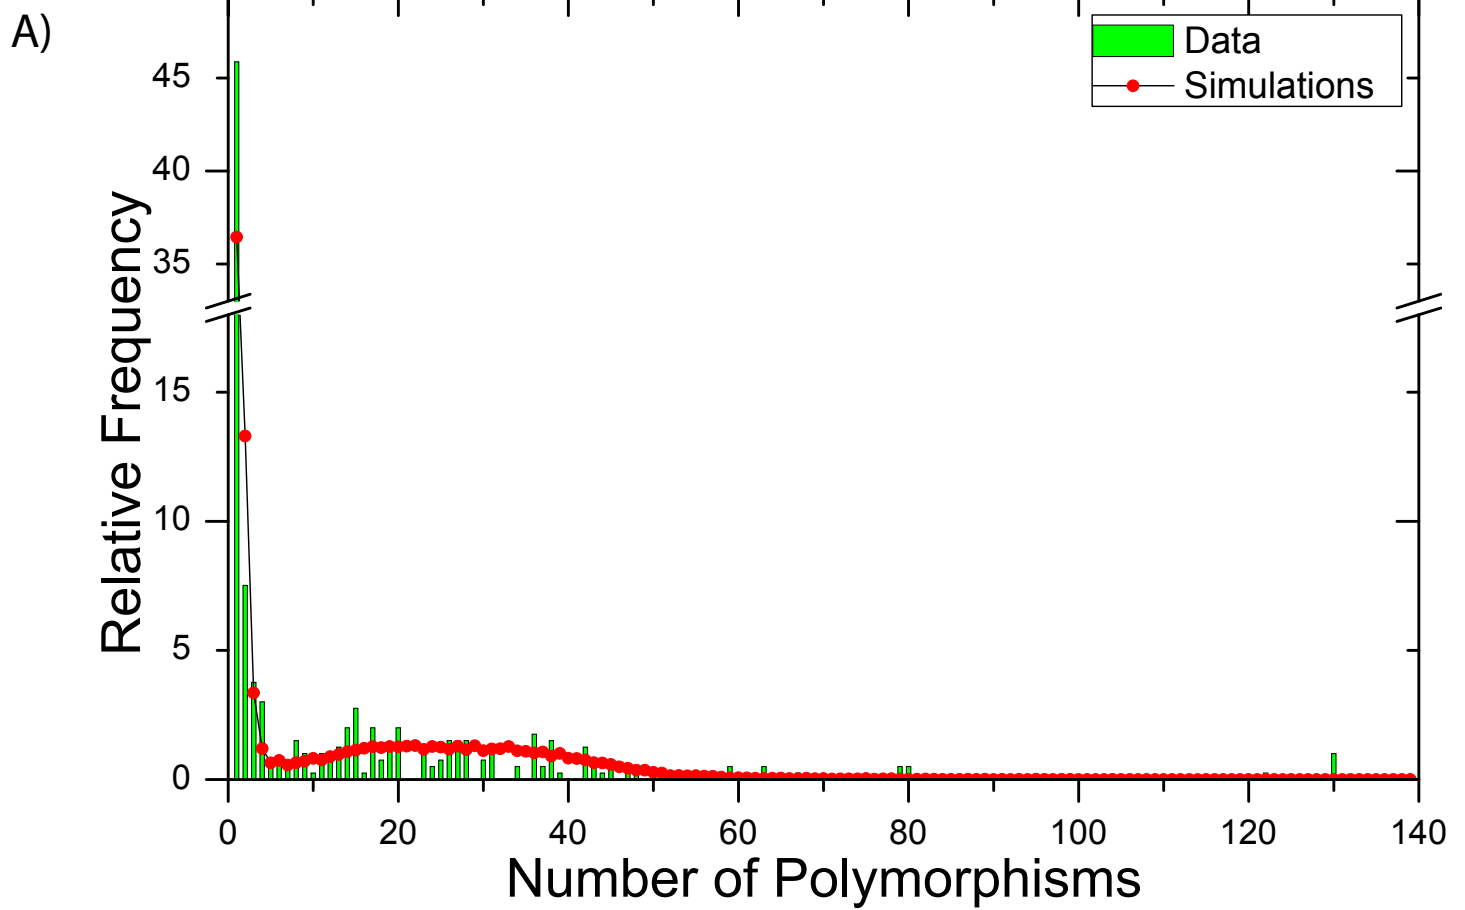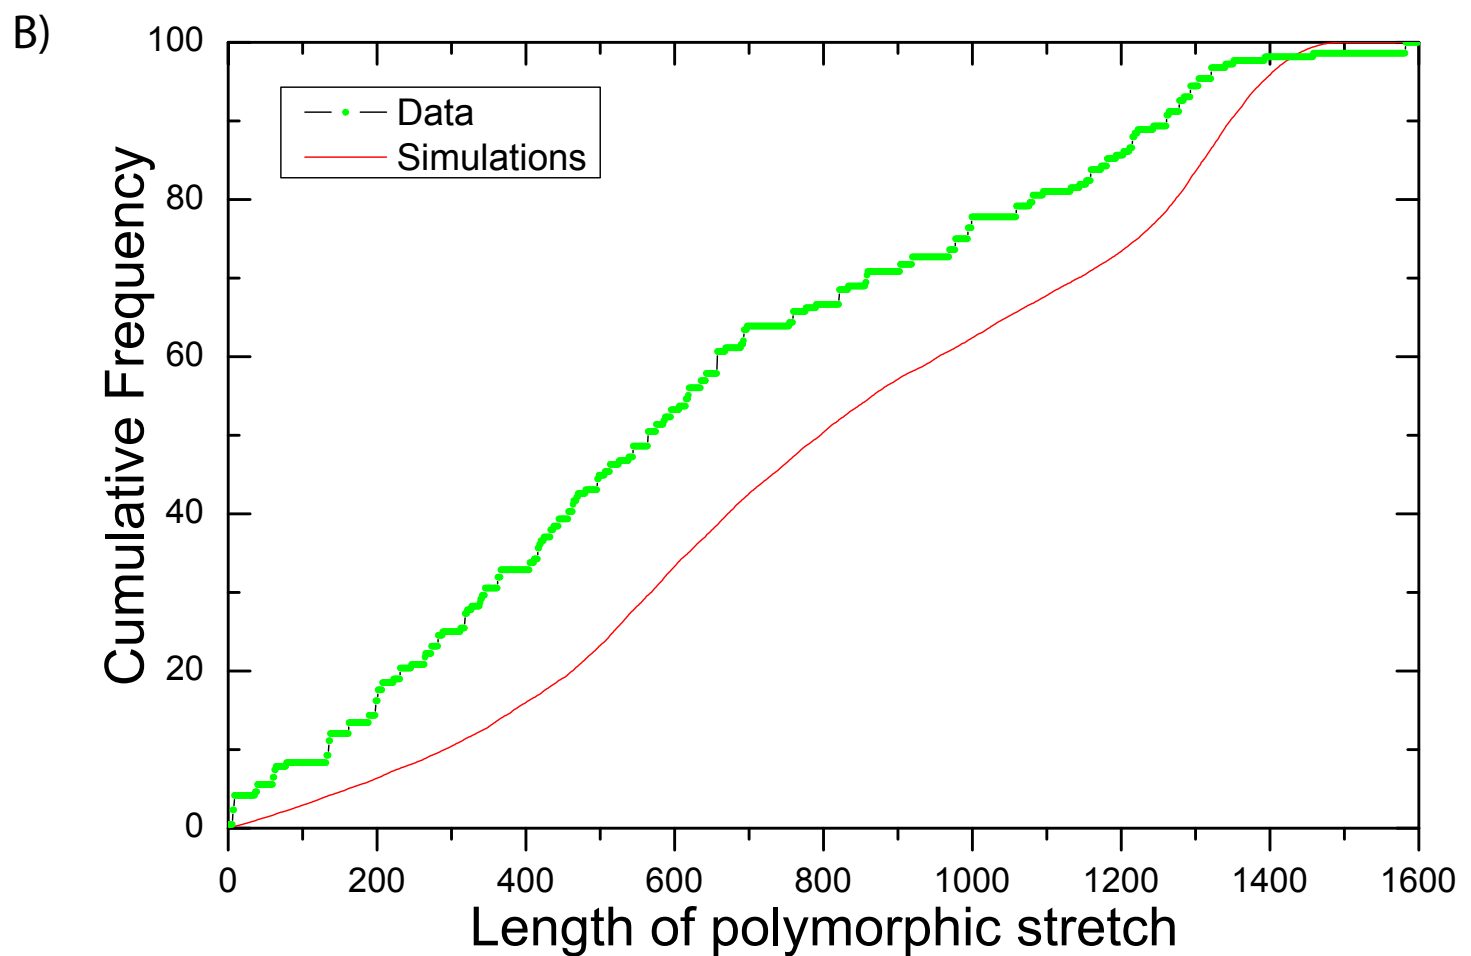

Figure S2. Comparisons of data and simulations from family isolates. All other details are as in Fig. 5.
